# Supplementary material for: The Importance of Real-World Validation of Machine Learning Systems in Wearable Exercise Biofeedback Platforms: A Case Study
Source: MDPI journal article supplement (doi:10.3390/s21072346), 2021-03-27
Supplement: s1 [file s1]

Supplementary File 1:

| Algorithm                       | Metric (%)  | Exercise |       |       |       |
|---------------------------------|-------------|----------|-------|-------|-------|
|                                 |             | HS       | IRQ   | SLR   | SAKE  |
| Logistic Regression             | Accuracy    | 98.45    | 92.05 | 94.63 | 95.76 |
|                                 | Sensitivity | 99.43    | 93.73 | 95.95 | 96.26 |
|                                 | Specificity | 97.51    | 90.24 | 93.10 | 95.26 |
| Support Vector Machine with SMO | Accuracy    | 98.17    | 89.40 | 94.78 | 96.29 |
|                                 | Sensitivity | 99.14    | 90.31 | 96.22 | 96.52 |
|                                 | Specificity | 97.23    | 88.41 | 93.10 | 96.05 |
| Adaptive Boosting               | Accuracy    | 98.17    | 90.87 | 93.90 | 95.23 |
|                                 | Sensitivity | 99.43    | 90.60 | 95.95 | 95.19 |
|                                 | Specificity | 96.95    | 91.16 | 91.54 | 95.26 |
| Random Forest                   | Accuracy    | 98.03    | 88.07 | 90.71 | 96.29 |
|                                 | Sensitivity | 98.86    | 87.46 | 92.16 | 96.52 |
|                                 | Specificity | 97.23    | 88.72 | 89.03 | 96.05 |
| J48                             | Accuracy    | 96.06    | 83.80 | 89.55 | 95.09 |
|                                 | Sensitivity | 96.29    | 85.19 | 91.62 | 95.99 |
|                                 | Specificity | 95.84    | 82.32 | 87.15 | 94.21 |

LOSOCV results for all ML models trained and tested. The best performing algorithm for each exercise is highlighted in green and used within the example system.
